# Supplementary material for: Incidence and prevalence of neurofibromatosis type 1 and 2: a systematic review and meta-analysis
Source: Springer Nature journal article supplement (doi:10.1186/s13023-023-02911-2), 2023-09-14

| Study                 | Events | Total          | Events per 10000 observations |                       |
|-----------------------|--------|----------------|-------------------------------|-----------------------|
|                       |        |                | GLMM, Random, 95% CI          | GLMM, Random, 95% CI  |
| Garty 1994            | 390    | 374440         | 10.416                        | [9.408; 11.502]       |
| Poyhonen 2000         | 116    | 423075         | 2.742                         | [2.266; 3.288]        |
| Lammert 2005          | 51     | 152819         | 3.337                         | [2.485; 4.388]        |
| Ingordo 2007          | 6      | 34740          | 1.727                         | [0.634; 3.759]        |
| Evans 2010            | 206    | 558832         | 3.686                         | [3.200; 4.225]        |
| Orraca 2014           | 17     | 19392          | 8.767                         | [5.108; 14.032]       |
| Uusitalo 2015         | 101    | 189021         | 5.343                         | [4.352; 6.492]        |
| <b>Total (95% CI)</b> |        | <b>1752319</b> | <b>4.414</b>                  | <b>[2.916; 6.680]</b> |

Heterogeneity:  $\tau^2 = 0.2833$ ;  $\chi^2 = 269.07$ ,  $df = 6$  ( $P < 0.01$ );  $I^2 = 98\%$

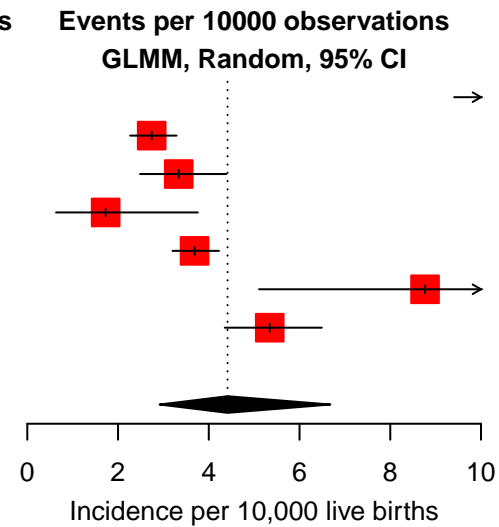

Supplement: MOESM2 [file 26042996]
